# 1 **Verification of extracellular vesicle-mediated functional mRNA delivery** 2 **via RNA editing**

3

4 Masaharu Somiya\* and Shun'ichi Kuroda

5

6 SANKEN (The Institute of Scientific and Industrial Research), Osaka University, Ibaraki, Osaka 567-0047,  
7 Japan

8 \* To whom correspondence should be addressed. Tel: 81-6-6879-8462; Email: msomiya@sanken.osaka-u.ac.jp

9 Present Address: Prof. Masaharu Somiya, Ph.D., Department of Biomolecular Science and Reaction, SANKEN  
10 (The Institute of Scientific and Industrial Research), Osaka University, Mihogaoka 8-1, Ibaraki, Osaka 567-  
11 0047, Japan

12

## 13 **ABSTRACT**

14 The secretion and delivery of mRNA by extracellular vesicles (EVs) may contribute to intercellular  
15 communications. Several reporter assays have been developed to quantify EV-mediated functional delivery of  
16 mRNA into recipient cells. However, mRNA delivery efficiency can often be overestimated by experimental  
17 artifacts, resulting in “pseudo-delivery” of reporter proteins rather than mRNA. In this study, we revealed that  
18 substantial amounts of reporter proteins expressed in donor cells are secreted into the medium and interfere with  
19 the reporter assay. To eliminate this pseudo-delivery, we established a functional RNA delivery assay that  
20 employs an RNA editing tool, enabling the verification of *bona fide* delivery of mRNA into recipient cells. The  
21 donor cells expressed a reporter gene containing a stop codon in a non-functional open reading frame. After EV-  
22 mediated delivery of reporter mRNAs to the recipient cells, guide RNAs and RNA editing enzymes (dCas13b-  
23 hADAR2 fusion proteins) correct the RNA sequence and induce the expression of functional reporter proteins in  
24 the recipient cells. Using this system, we showed that EVs containing alphavirus-derived replicon successfully  
25 delivered functional RNA and expressed the reporter proteins. The RNA delivery assay using RNA editing  
26 enables the precise analysis of EV-mediated mRNA delivery.

27

## 28 **KEYWORDS**

29 Alphavirus replicon; CRISPR-Cas13; exosome; extracellular vesicle; mRNA delivery; RNA editing

30

## 31 INTRODUCTION

32

33 Extracellular vesicles (EVs) contain various species of RNAs, such as microRNAs, messenger RNAs (mRNAs),  
34 and non-coding RNAs. Extracellular RNAs (exRNA) in EVs are thought to be functionally delivered from  
35 donor to recipient cells and regulate biological processes (1, 2). Several studies have demonstrated that EVs  
36 deliver mRNAs from donor to recipient cells and functionally translated to the corresponding proteins (1, 3–7).  
37 Nevertheless, it is argued that the EV-mediated cargo delivery process might be inefficient (4, 8–10). This  
38 controversy is mainly due to the lack of a sensitive and robust bioassay to decipher the delivery mechanism and  
39 efficiency of EVs, especially for mRNA-mediated delivery.

40 Although intercellular shuttling of mRNA is an attractive and plausible mechanism, there are notable caveats  
41 in previous studies. For instance, proteins of interest often contaminate the EV preparation, leading to a  
42 “pseudo-delivery” of proteins rather than mRNA. Additionally, the transfer of mRNA between the donor and  
43 recipient cells is often evaluated by the expression or translation of a reporter gene, such as fluorescence or  
44 luminescence proteins, due to its ease of detection and quantification. For the mRNA delivery assay, reporter  
45 genes are introduced into the donor cells and expressed, hence, reporter mRNAs are loaded into EVs and  
46 secreted. Along with mRNAs, a substantial amount of reporter proteins is expressed in the donor cells and  
47 passively loaded into the EVs. Therefore, reporter proteins expressed in the donor cells might be secreted into  
48 the conditioned medium due to cell death or other mechanisms. Since reporter proteins are highly sensitive, the  
49 contamination of a trace amount of reporter proteins in EV preparations may significantly affect the assay  
50 readout. Viral vector preparations are often contaminated with proteins; this contamination leads to a false-  
51 positive signal in the target cells, and this process is called “pseudo-transduction” (11, 12). EV-mediated mRNA  
52 delivery may be overestimated because of the contamination of reporter proteins in EVs and the conditioned  
53 medium. Therefore, there is an urgent need to develop a robust and reliable bioassay to evaluate the intercellular  
54 delivery of mRNA from the donor cells to the recipient cells, while excluding the effect of contamination with  
55 reporter proteins.

56 In this study, we developed a reporter gene assay using an RNA editing tool to examine functional RNA  
57 delivery. In this assay, upon the EV-mediated delivery of non-functional mRNA into recipient cells, the RNA  
58 editing enzyme dCas13b-ADAR2 fusion protein (13) converts the RNA into a functional form, facilitating the  
59 detection of mRNA delivery.

60

## 61 MATERIAL AND METHODS

62

### 63 Reagents

64 The NanoLuc substrate, Nano-Glo® Luciferase Assay System, was purchased from Promega Corporation.  
65 Synthetic siRNAs were designed and manufactured by Nippon Gene Co., Ltd. and GeneDesign, Inc. The  
66 sequences of the antisense strand for siRNA targeting NanoLuc and firefly luciferase were 5'-  
67 AUUUUUUCGAUCUGGCCCA-3' and 5'-UCGAAGUACUCAGCGUAAGTT-3' (14), respectively.

68

### 69 Biological Resources

70 The plasmids used in this study were constructed using a conventional PCR-based method (15). Supplementary  
71 Table lists the plasmids used in the present study. Plasmids for VSV-G (Addgene #80054), EGFP (Addgene  
72 #89684), and dCas13b-hA2DR2 (Addgene #103871) were kindly gifted by Wesley Sundquist, Wilson Wong,  
73 and Feng Zhang, respectively.

74 Human-derived HEK293T cells (RIKEN Cell Bank) were cultured in Dulbecco's modified Eagle medium  
75 (DMEM, high glucose formulation, Nacalai Tesque) containing 10% fetal bovine serum (FBS) and 10  $\mu$ g/mL  
76 penicillin-streptomycin at 37°C in a humidified 5% CO<sub>2</sub> atmosphere.

77

### 78 **mRNA transfer assay**

79 HEK293T cells were transfected using 25-kDa branched polyethyleneimine (PEI, Sigma) as previously  
80 described (8). Briefly, the donor HEK293T cells were seeded in 12 well plates ( $1-2 \times 10^5$  cells/well, 1 mL/well)  
81 or 60 mm dish ( $1 \times 10^6$  cells/dish, 5 mL/dish) and cultured overnight. The next day, cells were transfected with  
82 plasmid DNA (500 ng/well or 2.5  $\mu$ g/dish, for 12 well plate or 60 mm dish, respectively) and cultured for 2–3  
83 days. After culture, the conditioned medium was collected and centrifuged at  $1,500 \times g$  for 5 min to remove cell  
84 debris. For the isolation of EVs, the conditioned medium was further purified by ultracentrifugation, as  
85 previously described (8). Briefly, 1 to 5 mL of supernatant was mixed with PBS and ultracentrifuged ( $210,000 \times$   
86  $g$  for 70 min by CP100MX ultracentrifuge (Hitachi) and P40ST swing rotor (Hitachi)), then the EV pellet was  
87 washed with 12 mL of PBS and centrifuged again, followed by the resuspension in approximately 200  $\mu$ L of  
88 PBS.

89 Recipient HEK293T cells were transfected one day before the addition of conditioned medium or EVs with  
90 corresponding plasmid DNA with or without siRNA, as previously described (8). Recipient HEK293T cells  
91 were seeded in 96 well plates ( $(1-2 \times 10^4$  cells/well, 100  $\mu$ L/well) and cultured overnight, and then transfected  
92 with 100 ng/well of plasmid DNA with or without 1 pmol/well of siRNA. The transfected recipient cells were  
93 treated with 100  $\mu$ L of conditioned medium or 10  $\mu$ L of purified EVs and cultured for up to 24 h. To evaluate  
94 NanoLuc activity, cells were mixed with NanoLuc substrate according to the manufacturer's instructions. The  
95 luminescence signal was quantified using a plate reader (Synergy 2, BioTek).

96

### 97 **Statistical analysis**

98 All experiments were performed in three replicates and conducted at least twice to confirm reproducibility. The  
99 data were statistically analyzed using a two-tailed Student's *t*-test or one-way ANOVA followed by Tukey's  
100 HSD test using the Real Statistics Resource Pack software created by Charles Zaiontz.

101

## 102 **RESULTS**

103

### 104 **Reporter proteins in the conditioned medium interfere with the mRNA delivery assay**

105

106 First, we investigated whether the contamination with reporter proteins in the conditioned medium affected the  
107 assay readout. After transfection with plasmids encoding highly bright luciferase NanoLuc originated from  
108 *Oplophorus gracilirostris* (16), and the vesicular stomatitis virus glycoprotein (VSV-G), which are known to

109 significantly improve the delivery efficiency of EVs (17, 18), a conditioned medium was collected and added to  
 110 the recipient human embryonic kidney 293 (HEK293T) cells that were either transfected with siRNAs targeting  
 111 NanoLuc or control siRNA. If the mRNAs were successfully delivered into recipient cells, strong NanoLuc  
 112 activity in the recipient cells should be observed, whereas pre-treatment with siRNA targeting NanoLuc should  
 113 reduce NanoLuc expression in recipient cells by RNA interference mechanism (19). As shown in Figure 1A, we  
 114 observed a strong NanoLuc activity in recipient cells with VSV-G-conjugated EVs compared to the control  
 115 (fluorescent protein EGFP). However, we did not observe a significant RNAi-mediated NanoLuc knockdown.  
 116 These results suggest that rather than NanoLuc mRNAs, the NanoLuc proteins expressed in the donor cells were  
 117 delivered to the recipient cells, regardless of the presence of VSV-G.  
 118

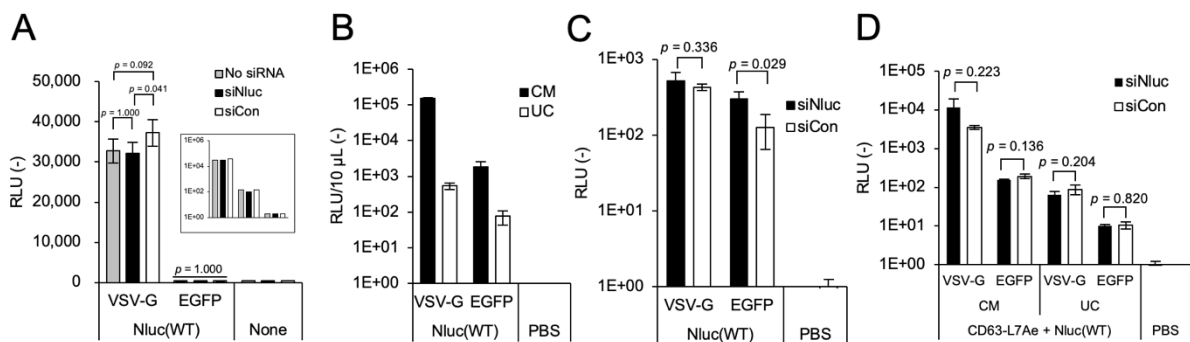

119  
 120 **Figure 1.** Contamination with reporter NanoLuc proteins in the conditioned medium affected the NanoLuc activity in the  
 121 recipient cells.  
 122 (A) NanoLuc activity in recipient HEK293T cells cultured with conditioned medium from donor HEK293T cells. Recipient  
 123 cells were transfected with or without siRNA targeting NanoLuc (siNluc) or firefly luciferase (siCon, as a negative control)  
 124 and cultured with 100 μL of conditioned medium for 24 h. Log scale (inset plot) chart was used for the comparison. (B)  
 125 NanoLuc activity in the conditioned medium (CM) and purified EV preparation after ultracentrifugation (UC). The relative  
 126 luminescence unit (RLU) per 10 μL of samples is shown. (C) Treatment of recipient HEK293T cells with EVs purified by  
 127 ultracentrifugation. (D) Conditioned medium (CM) or EVs purified by ultracentrifugation (UC) from donor HEK293T cells  
 128 expressing RNA loading proteins (CD63-L7Ae), mRNA encoding NanoLuc with tandem C/D box, and VSV-G, were  
 129 applied to recipient HEK293T cells.  
 130 N = 3, mean ± SD. The data were analyzed by one-way ANOVA followed by Tukey's HSD test (A) or Student's t-test ((C)  
 131 and (D)).

132  
 133 Next, we isolated EVs from the conditioned medium by ultracentrifugation (Figure 1B). Before  
 134 ultracentrifugation, the conditioned medium from the donor cells expressing NanoLuc showed high NanoLuc  
 135 activity, suggesting that a substantial amount of NanoLuc proteins had leaked from the donor cells and  
 136 contaminated the conditioned medium. Even after ultracentrifugation, the EV preparation showed NanoLuc  
 137 activity, which was significantly lower than the original conditioned medium, suggesting that despite the  
 138 removal of the majority of NanoLuc, a substantial amount of NanoLuc proteins remained following  
 139 ultracentrifugation. Moreover, the addition of purified EVs to the recipient cells significantly increased the  
 140 NanoLuc activity, which was not affected by the siRNA targeting NanoLuc (Figure 1C). These results show that

141 the reporter proteins contaminating the conditioned medium remained in EV preparations even after purification  
142 by ultracentrifugation and that the transporter proteins led to pseudo-delivery in recipient cells.

143 Previous studies have shown that mRNA can be loaded into EVs and delivered into recipient cells using the  
144 EXOTic system which relies on the interactions between the RNA binding proteins L7Ae and specific RNA  
145 sequences (kink-turn RNA motif C/D box) (3, 7). We mimicked this system to determine whether this EV-  
146 mediated mRNA delivery system was affected by transporter reporter proteins. Donor HEK293T cells were  
147 transfected with plasmids encoding CD63-L7Ae, NanoLuc with tandem C/D box at the 3'-UTR, and VSV-G as  
148 a delivery enhancer. We then added the transfected donor cell-derived conditioned medium or EVs purified by  
149 ultracentrifugation to recipient cells (Figure 1D). Although we observed NanoLuc activity in the recipient cells,  
150 this activity was not inhibited by pre-transfection with siRNA targeting NanoLuc, suggesting that the RNA  
151 loading system failed to functionally deliver mRNAs into recipient cells, thereby confirming that  
152 ultracentrifugation was unable to eliminate the transport of NanoLuc proteins.

153

#### 154 **RNA editing for the functional RNA delivery assay**

155

156 Since contaminations with reporter proteins significantly affect the mRNA delivery assay and lead to an  
157 overestimation of the delivery efficiency, we modified the delivery assay, as shown in Figure 2A, to employ a  
158 programmable CRISPR-Cas13 system (13). In this assay, we introduced a stop codon at the 12th tryptophan  
159 (Trp) operon of the NanoLuc gene. We utilized the RNA editing tool, a fusion protein of catalytically inactive  
160 Cas13b (dCas13b) and hADAR2 deaminase domain (E488Q/T375G mutations and lack of C-terminal 984-1090  
161 region), designated as dCas13b-hADDR2, together with the targeting guide RNA (gRNA). The complex of  
162 dCas13b-hADDR2 and gRNA edits the amber stop codon (UAG) to UGG, thereby making the mRNAs express  
163 the NanoLuc protein. In this system, the donor cells lack the RNA editing mechanism and cannot functionally  
164 express NanoLuc; therefore, virtually no transporter NanoLuc protein exists in the conditioned medium and EV  
165 preparations. Using this system, we can precisely evaluate functional mRNA delivery while excluding the  
166 contamination with transporter reporter proteins from donor cells. This novel mRNA delivery assay was  
167 designated as an RNA-editing-based mRNA delivery assay (REMD assay).

168

169

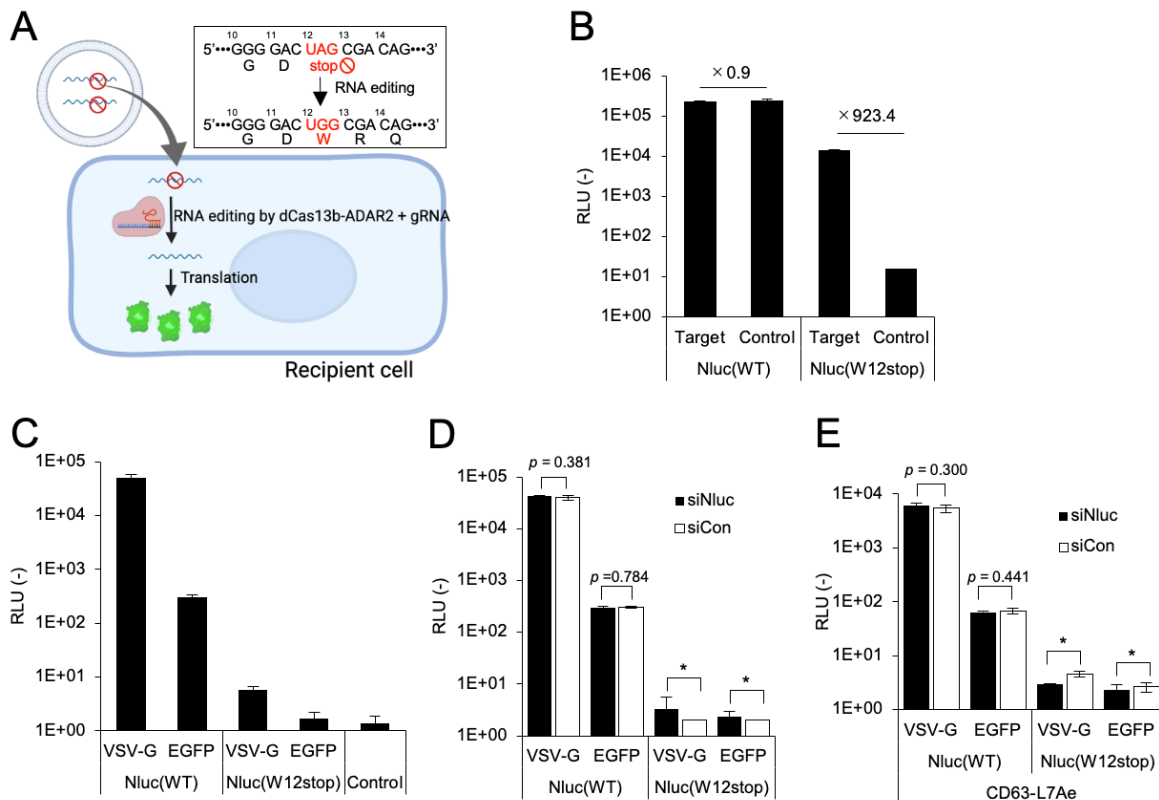

170

171

**Figure 2.** mRNA delivery assay employing CRISPR-Cas13b-based RNA editing tool (REMD assay).

172

(A) Schematic representation of the REMD assay. The upper right inset explains the conversion of the 12th UAG stop codon to the UGG codon of Nluc(W12stop) by dCas13b-hADAR2 and gRNA. (B) Conversion of Nluc(W12stop) mRNA to translationally active mRNA by targeting gRNA in HEK293T cells. Control gRNA targets EGFP(W58stop) and does not affect Nluc(W12stop) mRNA. (C) Validation of REMD assay using donor HEK293T-derived conditioned medium.

175

Recipient HEK293T cells expressing dCas13b-hADAR2 and target gRNA were treated with a conditioned medium for 24 h.

176

(D) REMD assay combined with siRNA treatment. Recipient HEK293T cells transfected with RNA editing tool and siRNA

177

were treated with conditioned medium for 24 h. (E) REMD assay for validation of mRNA delivery using EXOTIC system

178

employing NanoLuc(W12stop)-2xC/D box, CD63-L7Ae, and VSV-G.

179

N = 3, mean ± SD. The data were analyzed using Student's t-test. Asterisks indicate that the statistical analysis was not

180

performed because the luminescence signal was at the background level.

181

182

183

First, we confirmed that the dCas13b-hADAR2 and gRNA complex can precisely edit NanoLuc(W12 stop)

184

mRNA by transfecting HEK293T cells with plasmids encoding NanoLuc(W12 stop), dCas13b-hADAR2, and

185

gRNA, and measuring NanoLuc activity (Figure 2B). The control, NanoLuc without a stop codon, Nluc(WT),

186

was highly expressed regardless of RNA editing, as expected. The luciferase activity of NanoLuc(W12stop) was

187

significantly restored by gRNA targeting Nluc(W12stop), compared to the control gRNA targeting EGFP

188

(W58stop) (20). Thus, we confirmed functional RNA editing using a newly designed gRNA targeting

189

NanoLuc(W12stop).

190

Next, using the REMD assay, we verified EV-mediated mRNA delivery. Donor cells were transfected with

191

plasmids encoding either Nluc(WT) or Nluc(W12stop), together with VSV-G or EGFP, and the conditioned

192

medium was added to recipient cells expressing RNA editing tools, dCas13b-hADAR2, and gRNA (Figure 2C).

193 We found that NanoLuc in recipient cells cultured with NanoLuc(W12stop) showed background levels of  
194 activity (RLU < 10), whereas recipient cells cultured with NanoLuc(WT) showed high activity (RLU > 10<sup>4</sup> in  
195 the presence of VSV-G). This result indicated that pseudo-delivery of reporter NanoLuc protein in the mRNA  
196 delivery assay was successfully excluded using RNA editing tools. We further confirmed the pseudo-delivery of  
197 reporter proteins using siRNA (Figure 2D). Knockdown experiments demonstrated that NanoLuc activity in  
198 donor cells expressing NanoLuc(WT) was not affected by siNluc, strongly suggesting that transporter NanoLuc  
199 proteins significantly affected the mRNA delivery assay.

200 We further verified the previously reported EV-mediated RNA delivery system (EXOtic device) (3) using  
201 the REMD assay. Conditioned medium from donor cells expressing Nluc(W12stop)-2 × C/D box, CD63-L7Ae,  
202 and VSV-G was added to the recipient cells, and functional mRNA delivery was evaluated (Figure 2E).  
203 Conditioned medium from donor cells expressing NanoLuc (WT) showed significant NanoLuc activity in  
204 recipient cells. NanoLuc activity of NanoLuc(WT) samples was derived from transporter reporter proteins, as  
205 confirmed by the siRNA targeting NanoLuc. We postulated that the NanoLuc activity observed in recipient cells  
206 in a previous study was likely due to contamination with transporter reporter proteins (3). These results indicate  
207 that the REMD assay can distinguish *bona fide* mRNA delivery from experimental artifacts owing to the  
208 transporter reporter proteins from donor cells.

209

#### 210 **Engineered EVs containing alphavirus replicon for functional RNA delivery**

211

212 We speculated that EV-mediated mRNA delivery has often been overestimated due to contaminations with  
213 transporter proteins in the conditioned medium and purified EV preparations. The question remains whether  
214 EVs are capable of delivering functional mRNA into recipient cells. Previous studies demonstrated that EVs  
215 containing VSV-G and alphavirus replicon RNA can functionally deliver genetic information and express  
216 exogenous proteins in recipient cells (21, 22). We used this Venezuelan equine encephalitis virus (VEEV)-  
217 derived replicon RNA system (23) encodes the reporter NanoLuc gene under the subgenomic promoter, and  
218 supplied VSV-G in *trans* to facilitate the endosomal escape of EVs.

219 We evaluated the functional mRNA delivery of engineered EVs containing VEEV-derived replicon RNA  
220 using the REMD assay (Figure 3A). The VEEV-NanoLuc(WT) samples showed significant NanoLuc activity  
221 regardless of the sequence of gRNA, indicating pseudo-delivery of reporter NanoLuc proteins. In contrast, EVs  
222 containing VEEV-NanoLuc(W12stop) and VSV-G induced NanoLuc activity in recipient cells expressing the  
223 targeting gRNA, suggesting that replicon RNAs were delivered to recipient cells and that RNA editing enzymes  
224 converted replicon RNAs into functionally translatable RNAs. The EVs containing VEEV-NanoLuc(W12stop)  
225 without VSV-G failed to functionally deliver the replicon RNA, suggesting that endosomal escape and  
226 cytoplasmic delivery of RNAs can be successfully achieved by engineering EVs with membrane fusion proteins.

227

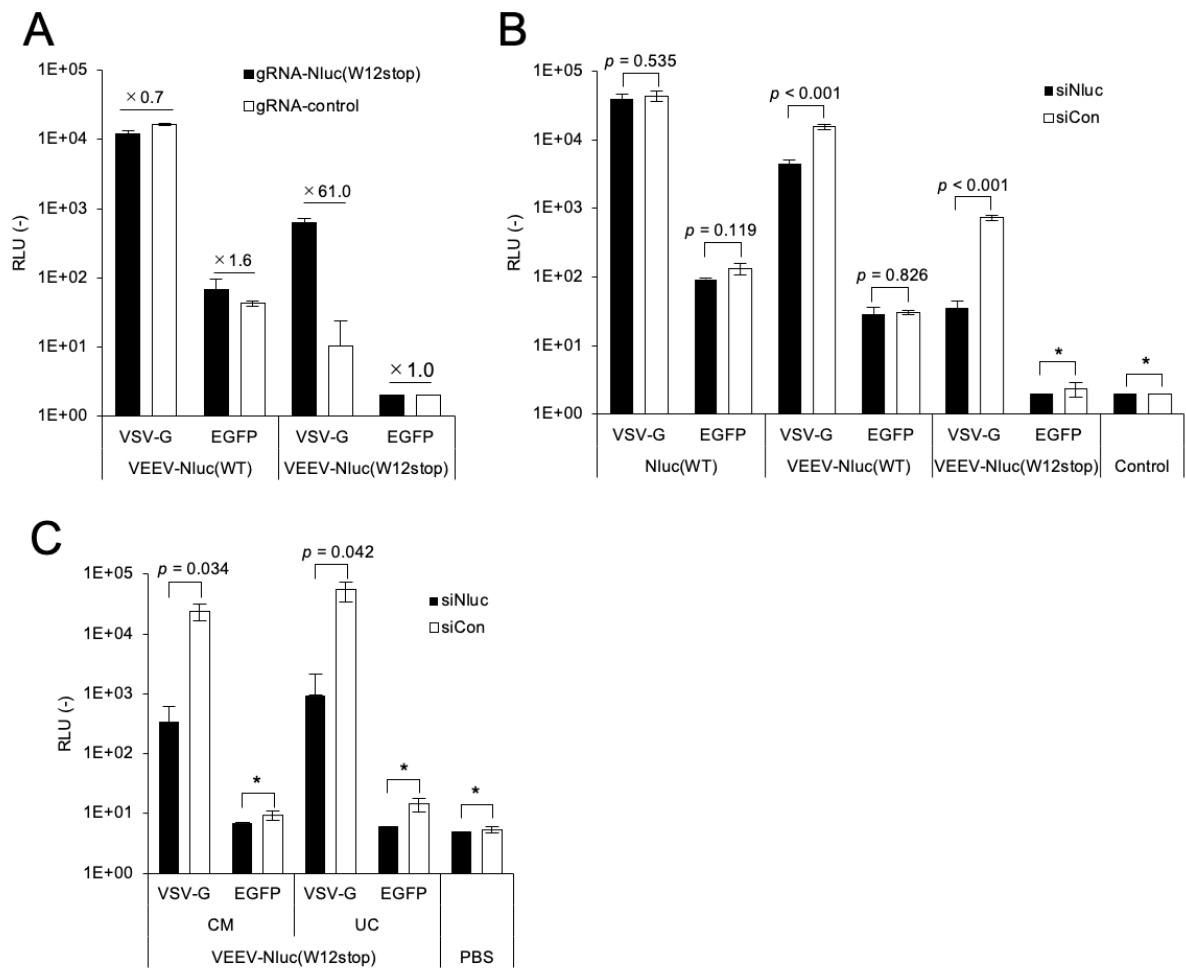

228

229 **Figure 3.** Evaluation of EV-mediated replicon RNA delivery by REMD assay.

230 (A) Donor HEK293T cells were transfected with plasmid encoding VEEV-Nluc(WT) or VEEV-Nluc(W12stop) together  
 231 with VSV-G or EGFP. The supernatant from the donor cells was added to recipient HEK293T cells expressing dCas13b-  
 232 hADAR2 and targeting or control gRNA and cultured for 24 h. Numbers above bars represent the fold-increase of RLU by  
 233 the target gRNA against the control gRNA. (B) Supernatant from transfected donor HEK293T cells was added to the  
 234 recipient HEK293T cells transfected with plasmid encoding dCas13b-hADAR2 and targeting gRNA, and siRNA targeting  
 235 NanoLuc (siNluc) or firefly luciferase (siCon). (C) Conditioned medium (CM) or ultracentrifugation-purified EVs (UC)  
 236 from transfected donor HEK293T cells was added to the recipient HEK293T. Due to the relatively lower luminescence  
 237 signal in this experiment, the sensitivity setting of the instrument was increased, therefore the values are not comparable to  
 238 other data.

239  $N = 3$ , mean  $\pm$  SD. The data were analyzed using Student's t-test. Asterisks indicate that the statistical analysis was not  
 240 performed because the luminescence signal was at the background level.

241

242 We further verified the engineered EV-mediated functional delivery of replicon RNA using siRNA (Figure  
 243 3B). The activity of NanoLuc in recipient cells treated with EVs containing VEEV-NanoLuc(WT) and VSV-G  
 244 was reduced by 70% ( $p < 0.001$ ), suggesting that a fraction of this activity was due to translation of functional  
 245 RNAs; however, transporter proteins still contributed to NanoLuc activity in recipient cells. In contrast, over  
 246 95% of NanoLuc activity by the EVs containing VEEV-NanoLuc(W12stop) and VSV-G was suppressed by



247 siRNA ( $p < 0.001$ ), strongly suggesting that NanoLuc activity was exclusively driven by the functional delivery  
248 of replicon RNA. As well as conditioned medium, purified EVs containing replicon RNA and VSV-G induced  
249 the reporter gene expression in the recipient cells, and the reporter gene expression was strongly inhibited by  
250 siRNA targeting NanoLuc (Fig. 3C). Collectively, these results confirm that the combination of the REMD  
251 assay and knockdowns using siRNA can detect EV-mediated functional RNA delivery into recipient cells.

252

## 253 **DISCUSSION**

254

255 In this study, we demonstrated that the reporter gene-based assay for EV-mediated mRNA delivery is easily  
256 affected by transporter reporter proteins. Therefore, we established a REMD assay that employs an RNA editing  
257 tool to exclude the pseudo-delivery of transporter proteins from donor cells. The key feature of the REMD assay  
258 is that the mRNA of the reporter gene is translationally inactive within the donor cells, and becomes  
259 translationally active in recipient cells through the conversion of a stop codon via CRISPR-Cas13b-mediated  
260 RNA editing. A previous study has shown that the codon replacement of the reporter gene is useful for studying  
261 RNA editing efficiency using the fluorescence protein EGFP with W58stop mutation (20). Compared to other  
262 fluorescence reporters, such as EGFP, NanoLuc shows higher sensitivity and a broader dynamic range.  
263 Therefore, we selected the NanoLuc reporter for the sensitive and robust evaluation of EV-mediated mRNA  
264 delivery in our REMD assay.

265 In this study, we showed that HEK293T-derived EVs could not deliver reporter mRNAs into recipient  
266 HEK293T cells. The activity of NanoLuc seen in recipient cells was derived from transporter proteins rather  
267 than *de novo* proteins translated from mRNA within recipient cells. Even after ultracentrifugation, transporter  
268 proteins remained in the EV preparation and significantly affected the assay readouts. As previously described  
269 by our group and other research groups, EVs have a low cargo delivery efficiency (4, 8, 9, 24, 25). Especially,  
270 Albanese et al. demonstrated that EVs from five different human cell lines could not deliver their cargo against  
271 17 different recipient cell lines unless donor cells express fusogenic proteins (i.e. VSV-G)(4). Thus, we  
272 concluded that, in general, EVs hardly deliver mRNA cargo into recipient cells. Conversely, some reports have  
273 argued that EVs have the potential to deliver RNA cargo into recipient cells and that mRNA is functionally  
274 translated. For example, Kojima et al. demonstrated that mRNA can be packaged into EVs using RNA-protein  
275 interactions, and the resultant EVs can functionally deliver the reporter mRNA into recipient cells with the help  
276 of production and delivery enhancers (3). However, using the REMD assay, we could not validate the findings  
277 of Kojima et al., and we speculated that their assay readout was overestimated due to the transporter reporter  
278 proteins in the EV preparation. It should be noted that Kojima et al. used combinations of EV-producing  
279 enhancers (STEAP3, NadB, and SDC4) and delivery enhancers (RVG-lamp2b and Cx43-S368A) together with  
280 a CD63-L7Ae and NanoLuc-C/D box. In contrast, we simplified the system using VSV-G as a delivery  
281 enhancer. The difference in the RNA delivery systems between these studies must be considered when  
282 interpreting the results. Furthermore, EV-mediated cargo delivery may be influenced by many factors, including  
283 the donor-recipient pair, preparation methods of EVs, and culture conditions of donor cells. Therefore, our  
284 findings suggesting that EVs cannot deliver mRNAs should not be generalized in a broad biological context.

285 We demonstrated that EVs containing viral glycoprotein (VSV-G) and alphavirus replicon successfully  
286 delivered RNAs and that a substantial amount of the reporter NanoLuc protein was expressed in recipient cells.  
287 The alphavirus replicon RNA replicates within the budding structure, called spherules, at the cell surface (26),  
288 and it was assumed that EVs containing both the alphavirus replicon and VSV-G can be released into the  
289 extracellular space (21). Upon EV-mediated cytoplasmic delivery, the replicon RNA can be self-amplified in the  
290 cytoplasm of recipient cells and strongly express the exogenous gene under the subgenomic promoter. The  
291 competency of the self-amplification of the alphavirus replicon makes it an ideal gene delivery vector because a  
292 small amount of replicon RNA can highly express the exogenous gene. This suggests that EVs containing an  
293 alphavirus replicon are an alternative strategy to successfully deliver functional RNA and express therapeutic  
294 genes in target recipient cells. Additionally, the glycoprotein of EVs can be replaced in a process called  
295 “pseudotyping” to alter the tropism of the target as conventional viral vectors (21, 27). Thus, pseudotyped EVs  
296 containing replicon RNA can target various tissues or cells.

297 In conclusion, our novel REMD assay is capable to investigate EV-mediated mRNA delivery by excluding  
298 artifacts derived from contamination. To date, the lack of a feasible and reliable reporter assay had hampered the  
299 understanding of the efficiency and mechanism of EV-mediated mRNA delivery. The REMD assay would help  
300 to settle the controversy of whether EV-mediated mRNA delivery practically contributes to intercellular  
301 communication and is physiologically relevant. Furthermore, efficient mRNA delivery is one of the key  
302 requirements for the development of novel modalities of therapeutics and vaccines based on the mRNA (28, 29).  
303 The REMD assay could be expanded to a broader context from fundamental research on EV-mediated mRNA  
304 delivery to validation of therapeutic delivery of mRNA.

305

#### 306 **DATA AVAILABILITY**

307 All data in this study were described in the main text.

308

#### 309 **ACKNOWLEDGMENTS**

310 We extend our gratitude to Yumi Yukawa for providing technical assistance in plasmid construction. All  
311 illustrations used in this study were created using BioRender.com.

312

#### 313 **FUNDING**

314 This work was supported in part by JSPS KAKENHI (Grant-in-Aid for Early-Career Scientists 18K18386 and  
315 20K15790 to MS), a research grant from the JGC-S Scholarship Foundation (to MS), and the “Dynamic  
316 Alliance for Open Innovation Bridging Human, Environment and Materials” (MEXT).

317

#### 318 **CONFLICT OF INTEREST**

319 The authors declare no conflict of statement.

320

#### 321 **REFERENCES**

- 322 1. Valadi,H., Ekström,K., Bossios,A., Sjöstrand,M., Lee,J.J. and Lötval,J.O. (2007) Exosome-mediated  
323 transfer of mRNAs and microRNAs is a novel mechanism of genetic exchange between cells. *Nat. Cell*  
324 *Biol.*, **9**, 654–659.
- 325 2. Raposo,G. and Stoorvogel,W. (2013) Extracellular vesicles: Exosomes, microvesicles, and friends. *J. Cell*  
326 *Biol.*, **200**, 373–383.
- 327 3. Kojima,R., Bojar,D., Rizzi,G., Hamri,G.C.-E., El-Baba,M.D., Saxena,P., Ausländer,S., Tan,K.R. and  
328 Fussenegger,M. (2018) Designer exosomes produced by implanted cells intracerebrally deliver therapeutic  
329 cargo for Parkinson’s disease treatment. *Nat. Commun.*, **9**.
- 330 4. Albanese,M., Chen,Y.-F.A., Hüls,C., Gärtner,K., Tagawa,T., Mejias-Perez,E., Keppler,O.T., Göbel,C.,  
331 Zeidler,R., Shein,M., *et al.* (2021) MicroRNAs are minor constituents of extracellular vesicles that are  
332 rarely delivered to target cells. *PLOS Genet.*, **17**, e1009951.
- 333 5. Yu,T., Wang,X., Zhi,T., Zhang,J., Wang,Y., Nie,E., Zhou,F., You,Y. and Liu,N. (2018) Delivery of MGMT  
334 mRNA to glioma cells by reactive astrocyte-derived exosomes confers a temozolomide resistance  
335 phenotype. *Cancer Lett.*, **433**, 210–220.
- 336 6. Ratajczak,J., Miekus,K., Kucia,M., Zhang,J., Reza,R., Dvorak,P. and Ratajczak,M.Z. (2006) Embryonic stem  
337 cell-derived microvesicles reprogram hematopoietic progenitors: evidence for horizontal transfer of mRNA  
338 and protein delivery. *Leukemia*, **20**, 847–856.
- 339 7. Shrivastava,S., Ray,R.M., Holguin,L., Echavarría,L., Grepo,N., Scott,T.A., Burnett,J. and Morris,K.V. (2021)  
340 Exosome-mediated stable epigenetic repression of HIV-1. *Nat. Commun.*, **12**, 5541.
- 341 8. Somiya,M. and Kuroda,S. (2021) Real-Time Luminescence Assay for Cytoplasmic Cargo Delivery of  
342 Extracellular Vesicles. *Anal. Chem.*, **93**, 5612–5620.
- 343 9. Somiya,M. and Kuroda,S. (2021) Reporter gene assay for membrane fusion of extracellular vesicles. *J.*  
344 *Extracell. Vesicles*, **10**.
- 345 10. Hung,M.E. and Leonard,J.N. (2016) A platform for actively loading cargo RNA to elucidate limiting steps  
346 in EV-mediated delivery. *J. Extracell. Vesicles*, **1**, 1–13.
- 347 11. Galla,M., Will,E., Kraunus,J., Chen,L. and Baum,C. (2004) Retroviral Pseudotransduction for Targeted Cell  
348 Manipulation. *Mol. Cell*, **16**, 309–315.
- 349 12. Liu,M.-L., Winther,B.L. and Kay,M.A. (1996) Pseudotransduction of Hepatocytes by Using Concentrated  
350 Pseudotyped Vesicular Stomatitis Virus G Glycoprotein (VSV-G)–Moloney Murine Leukemia Virus-  
351 Derived Retrovirus Vectors: Comparison of VSV-G and Amphotropic Vectors for Hepatic Gene Transfer.  
352 *J VIROL*, **70**, 6.
- 353 13. Cox,D.B.T., Gootenberg,J.S., Abudayyeh,O.O., Franklin,B., Kellner,M.J., Joung,J. and Zhang,F. (2017)  
354 RNA editing with CRISPR-Cas13. *Science*, **358**, 1019–1027.
- 355 14. Elbashir,S.M., Harborth,J., Weber,K. and Tuschl,T. (2002) Analysis of gene function in somatic mammalian  
356 cells using small interfering RNAs. *Methods San Diego Calif*, **26**, 199–213.
- 357 15. Gibson,D.G., Young,L., Chuang,R.-Y., Venter,J.C., Hutchison,C.A. and Smith,H.O. (2009) Enzymatic  
358 assembly of DNA molecules up to several hundred kilobases. *Nat. Methods*, **6**, 343–345.

- 359 16. Hall, M.P., Unch, J., Binkowski, B.F., Valley, M.P., Butler, B.L., Wood, M.G., Otto, P., Zimmerman, K.,  
360 Vidugiris, G., MacHleidt, T., *et al.* (2012) Engineered luciferase reporter from a deep sea shrimp utilizing a  
361 novel imidazopyrazinone substrate. *ACS Chem. Biol.*, 10.1021/cb3002478.
- 362 17. Votteler, J., Ogohara, C., Yi, S., Hsia, Y., Nattermann, U., Belnap, D.M., King, N.P. and Sundquist, W.I. (2016)  
363 Designed proteins induce the formation of nanocage-containing extracellular vesicles. *Nature*, **540**, 292–  
364 295.
- 365 18. Zhang, X., Xu, Q., Zi, Z., Liu, Z., Wan, C., Crisman, L., Shen, J. and Liu, X. (2020) Programmable Extracellular  
366 Vesicles for Macromolecule Delivery and Genome Modifications. *Dev. Cell*, **55**, 784–801.e9.
- 367 19. Somiya, M. (2020) Where does the cargo go?: Solutions to provide experimental support for the  
368 “extracellular vesicle cargo transfer hypothesis”. *J. Cell Commun. Signal.*, **14**, 135–146.
- 369 20. Montiel-Gonzalez, M.F., Vallecillo-Viejo, I., Yudowski, G.A. and Rosenthal, J.J.C. (2013) Correction of  
370 mutations within the cystic fibrosis transmembrane conductance regulator by site-directed RNA editing.  
371 *Proc. Natl. Acad. Sci.*, **110**, 18285–18290.
- 372 21. Rolls, M.M., Webster, P., Balba, N.H. and Rose, J.K. (1994) Novel infectious particles generated by  
373 expression of the vesicular stomatitis virus glycoprotein from a self-replicating RNA. *Cell*, **79**, 497–506.
- 374 22. Rose, N.F., Buonocore, L., Schell, J.B., Chattopadhyay, A., Bahl, K., Liu, X. and Rose, J.K. (2014) In vitro  
375 evolution of high-titer, virus-like vesicles containing a single structural protein. *Proc. Natl. Acad. Sci.*, **111**,  
376 16866–16871.
- 377 23. Yoshioka, N., Gros, E., Li, H.R., Kumar, S., Deacon, D.C., Maron, C., Muotri, A.R., Chi, N.C., Fu, X.D.,  
378 Yu, B.D., *et al.* (2013) Efficient generation of human iPSCs by a synthetic self-replicative RNA. *Cell Stem*  
379 *Cell*, **13**, 246–254.
- 380 24. Somiya, M. and Kuroda, S. (2021) Engineering of extracellular vesicles for small molecule-regulated cargo  
381 loading and cytoplasmic delivery of bioactive proteins. *bioRxiv*, 10.1101/2021.11.04.466099.
- 382 25. de Jong, O.G., Murphy, D.E., Mäger, I., Willms, E., Garcia-Guerra, A., Gitz-Francois, J.J., Lefferts, J., Gupta, D.,  
383 Steenbeek, S.C., van Rheenen, J., *et al.* (2020) A CRISPR-Cas9-based reporter system for single-cell  
384 detection of extracellular vesicle-mediated functional transfer of RNA. *Nat. Commun.*, **11**.
- 385 26. Pietilä, M.K., Hellström, K. and Ahola, T. (2017) Alphavirus polymerase and RNA replication. *Virus Res.*,  
386 **234**, 44–57.
- 387 27. Segel, M., Lash, B., Song, J., Ladha, A., Liu, C.C., Jin, X., Mekhedov, S.L., Macrae, R.K., Koonin, E.V. and  
388 Zhang, F. (2021) Mammalian retrovirus-like protein PEG10 packages its own mRNA and can be  
389 pseudotyped for mRNA delivery. *Science*, **373**, 882–889.
- 390 28. Pardi, N., Hogan, M.J., Porter, F.W. and Weissman, D. (2018) mRNA vaccines — a new era in vaccinology.  
391 *Nat. Rev. Drug Discov.*, 10.1038/nrd.2017.243.
- 392 29. Sahin, U., Karikó, K. and Türeci, Ö. (2014) mRNA-based therapeutics — developing a new class of drugs.  
393 *Nat. Rev. Drug Discov.*, **13**, 759–780.
- 394

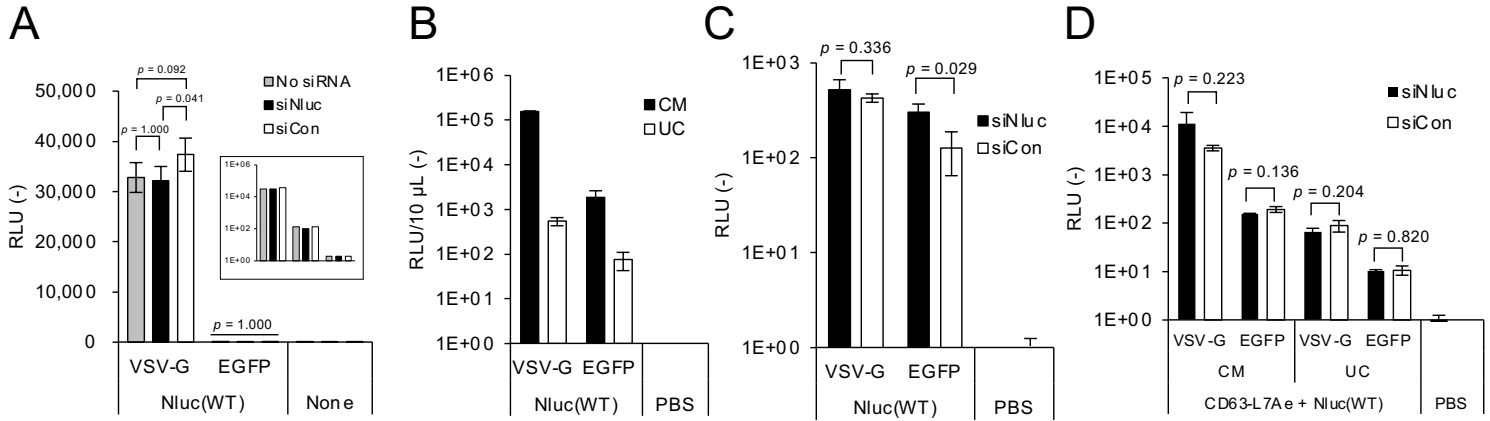

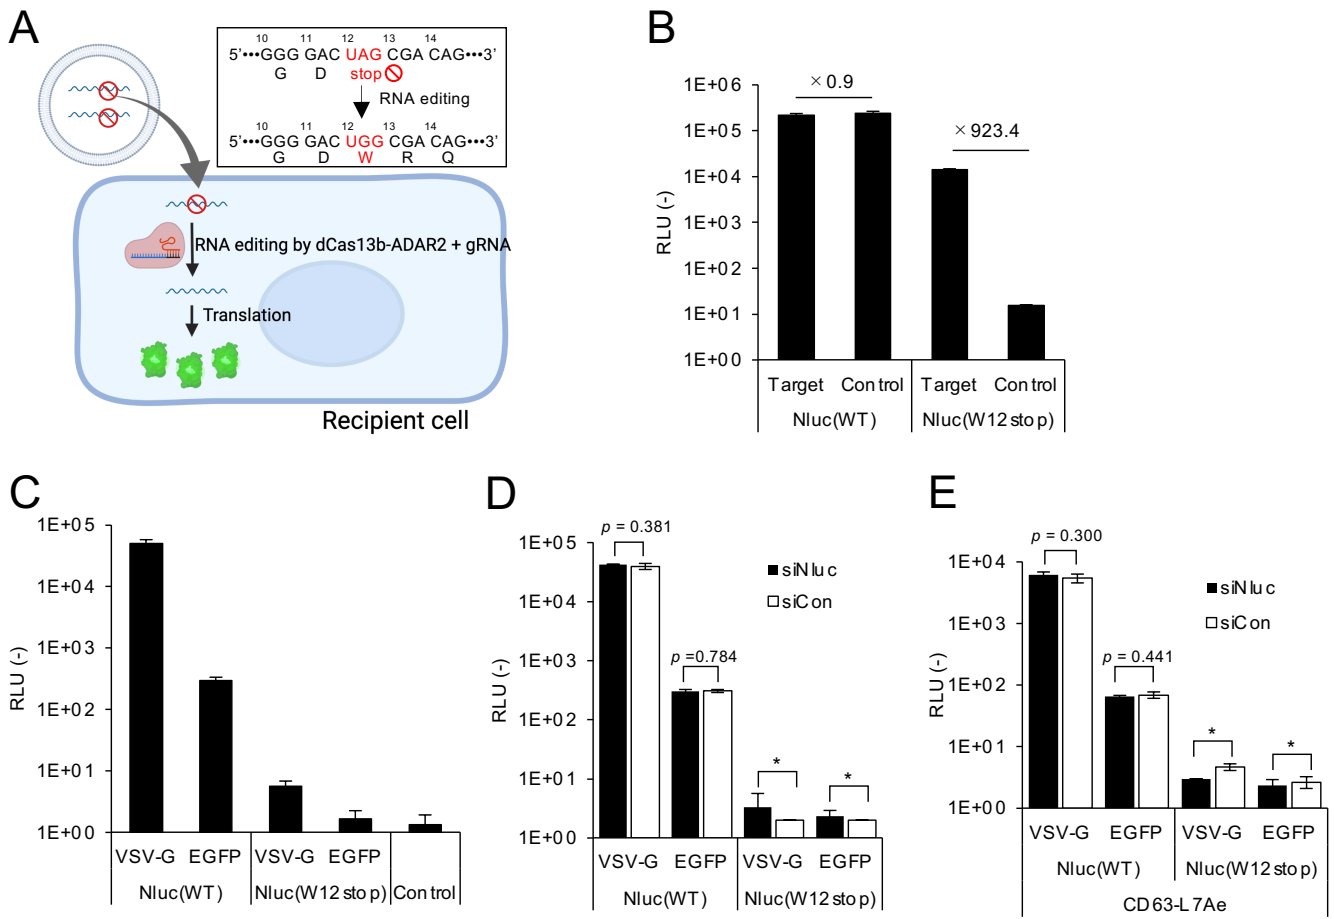

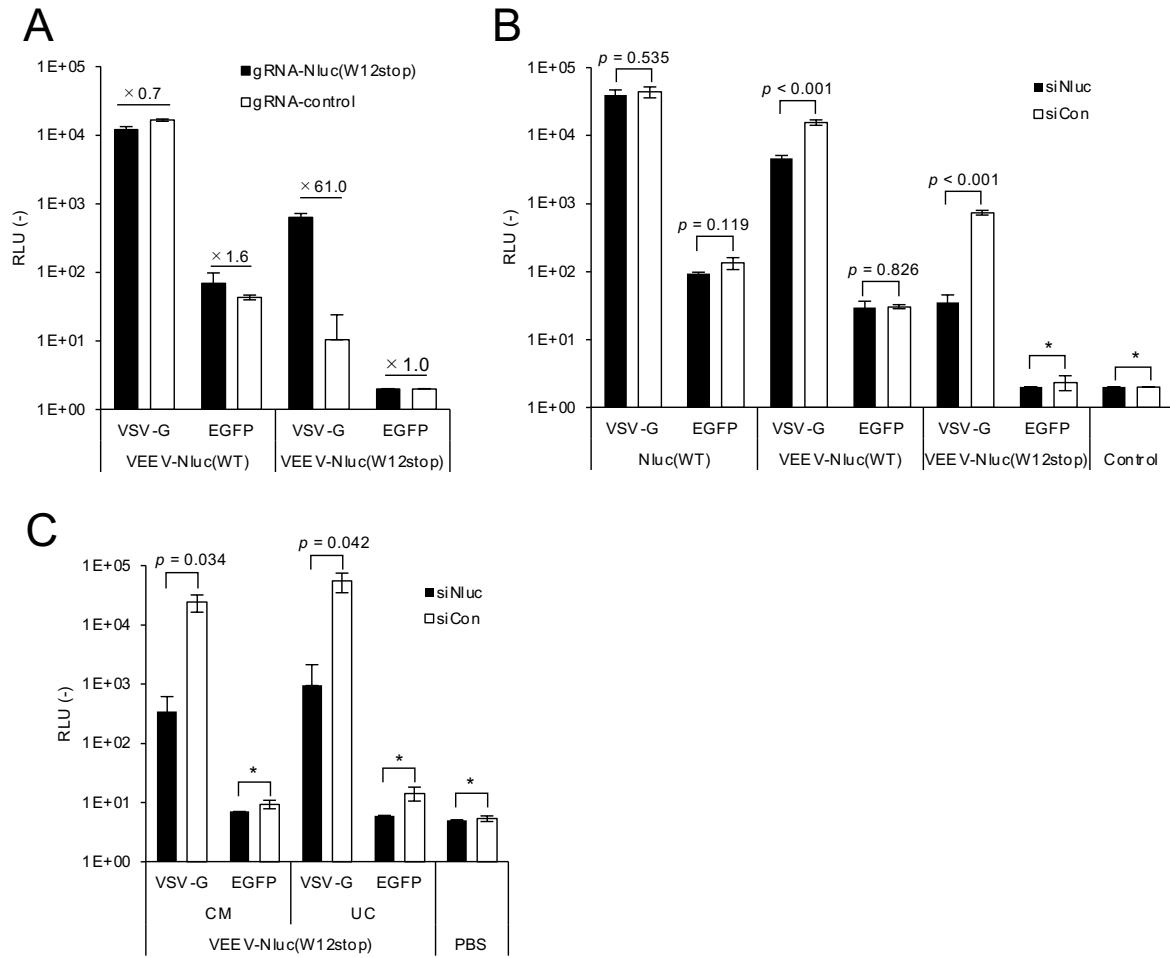

Source: http://biorxiv.org/content/10.1101/2022.01.25.477620v1.full.pdf
